# Supplementary material for: Radiogenomics of lower-grade gliomas: a radiomic signature as a biological surrogate for survival prediction
Source: publisher site journal article supplement (doi:10.18632/aging.101594), 2018-10-22
Supplement: Supplementary file [file aging-v10i10-101594-supplementary-material-SD2.pdf]

## SUPPLEMENTARY TABLES

**Supplementary Table 1. Univariable Cox of radiomic features in TCGA lower grade glioma patients.**

| Feature name                                | Interpretation                                                                                                                                                                                                                          | $\beta$ | 95%CI |       | HR    | <i>P</i>     |
|---------------------------------------------|-----------------------------------------------------------------------------------------------------------------------------------------------------------------------------------------------------------------------------------------|---------|-------|-------|-------|--------------|
|                                             |                                                                                                                                                                                                                                         |         | Lower | Upper |       |              |
| <b>Group3_Autocorrelation</b>               | A texture feature derived from Gray-Level Co-Occurrence Matrix based features. Autocorrelation evaluates the linear spatial relationship between texture primitives and measures the coarseness of an image.                            | -0.007  | 0.988 | 0.999 | 0.993 | <b>0.024</b> |
| <b>Group3_HighGrayLevelRunEmphasis</b>      | One of the texture features derived from Gray-Level Run-Length matrix based features. High Gray-Level Run Emphasis measures the distribution of high gray scale values. This feature is high for the image with high gray scale values. | -0.003  | 0.996 | 0.999 | 0.997 | <b>0.008</b> |
| <b>Group3_ShortRunHighGrayLevelEmphasis</b> | A texture feature derived from Gray-Level Run-Length matrix based features. Short Run High Gray Level Emphasis describes the complementary metric to the previous one for high gray levels.                                             | -0.005  | 0.992 | 0.998 | 0.995 | <b>0.002</b> |
| <b>Group3_SumAverage</b>                    | A texture feature derived from Gray-Level Co-Occurrence Matrix based features. Sum Average measures overall image brightness.                                                                                                           | -0.115  | 0.808 | 0.983 | 0.891 | <b>0.022</b> |
| <b>Group3_SumVariance</b>                   | One of the texture features derived from Gray-Level Co-Occurrence Matrix based features. It describes the overall voxel intensity value variability of the tumor.                                                                       | -0.002  | 0.996 | 0.999 | 0.998 | <b>0.024</b> |
| <b>Group3_Variance</b>                      | A texture feature derived from Gray-Level Co-Occurrence Matrix based features. Variance is a measure of how much the gray levels differ from the mean.                                                                                  | -0.007  | 0.987 | 0.999 | 0.993 | <b>0.023</b> |

**Supplementary Table 2. Genes involved in the “multicellular organism development” group.**

| Order | GO term                                       | Gene      | Pearson correlation coefficient* |
|-------|-----------------------------------------------|-----------|----------------------------------|
| 1     | GO:0007275~multicellular organism development | SPRED1    | 0.514802938                      |
| 2     | GO:0007275~multicellular organism development | SPRED2    | 0.479288376                      |
| 3     | GO:0007275~multicellular organism development | SPRY4     | 0.468034887                      |
| 4     | GO:0007275~multicellular organism development | EDA2R     | 0.463660169                      |
| 5     | GO:0007275~multicellular organism development | HILS1     | 0.443597755                      |
| 6     | GO:0007275~multicellular organism development | CREB3L1   | 0.402457048                      |
| 7     | GO:0007275~multicellular organism development | INVS      | 0.381701917                      |
| 8     | GO:0007275~multicellular organism development | GCNT2     | 0.361145274                      |
| 9     | GO:0007275~multicellular organism development | GGN       | 0.360364448                      |
| 10    | GO:0007275~multicellular organism development | LBH       | 0.351541368                      |
| 11    | GO:0007275~multicellular organism development | SPRY2     | 0.349641312                      |
| 12    | GO:0007275~multicellular organism development | EPHA2     | 0.337424369                      |
| 13    | GO:0007275~multicellular organism development | NFE2      | 0.336535386                      |
| 14    | GO:0007275~multicellular organism development | HMGA2     | 0.33571953                       |
| 15    | GO:0007275~multicellular organism development | INSL4     | 0.333116639                      |
| 16    | GO:0007275~multicellular organism development | OTX1      | 0.322126755                      |
| 17    | GO:0007275~multicellular organism development | CATSPER3  | 0.315592995                      |
| 18    | GO:0007275~multicellular organism development | TXNDC2    | 0.311809689                      |
| 19    | GO:0007275~multicellular organism development | TP53      | 0.309901514                      |
| 20    | GO:0007275~multicellular organism development | TNFRSF10B | 0.309109194                      |
| 21    | GO:0007275~multicellular organism development | EYA4      | 0.306919931                      |
| 22    | GO:0007275~multicellular organism development | SALL4     | 0.306853623                      |
| 23    | GO:0007275~multicellular organism development | LIF       | 0.301635627                      |

\*The Pearson correlation coefficient was calculated using the radiomic risk score and the expression of the genes.

**Supplementary Table 3. Clinical characteristics of lower grade gliomas in TCGA and CGGA datasets.**

|                            | TCGA cohort (n=85) | CGGA cohort (n=148) |
|----------------------------|--------------------|---------------------|
| <b>Age (range, median)</b> | 20-74(43)          | 18-63(38)           |
| <b>Sex</b>                 |                    |                     |
| Female                     | 49                 | 54                  |
| Male                       | 36                 | 94                  |
| <b>WHO Grade</b>           |                    |                     |
| WHO II                     | 45                 | 105                 |
| WHO III                    | 40                 | 43                  |
| <b>Seizure</b>             |                    |                     |
| Yes                        | 56                 | 89                  |
| No                         | 29                 | 59                  |
| <b>IDH status</b>          |                    |                     |
| Mutant                     | 65                 | 109                 |
| Wildtype                   | 20                 | 39                  |
| <b>ATRX</b>                |                    |                     |
| Mutant                     | 34                 | NA                  |
| Wildtype                   | 51                 | NA                  |
| <b>1p/19q</b>              |                    |                     |
| Codeletion                 | 21                 | 22                  |
| Non-codeletion             | 64                 | 47                  |
| NA                         | 0                  | 79                  |

NA = Not Available; TCGA = the Cancer Genome Atlas; CGGA = Chinese Glioma Genome Atlas

**Supplementary Table 4. Radiomics features extracted from T2-weight magnetic resonance image (n=55).**

| <b>Groups</b>                                  |                                             |                               |
|------------------------------------------------|---------------------------------------------|-------------------------------|
| <b>I. First order statistics (n=14)</b>        |                                             |                               |
| Energy                                         | Kurtosis                                    | Mean absolute deviation       |
| Entropy                                        | Maximum                                     | Median                        |
| Standard deviation                             | Mean                                        | Minimum                       |
| Uniformity                                     | Root mean square (RMS)                      | Range                         |
| Variance                                       | Skewness                                    |                               |
| <b>II. Shape and size based features (n=8)</b> |                                             |                               |
| Compactness 1                                  | Spherical disproportion                     | Surface area                  |
| Compactness 2                                  | Sphericity                                  | Surface to volume ratio       |
| Maximum 3D diameter                            | Volume                                      |                               |
| <b>III. Textural features (n=33)</b>           |                                             |                               |
| Gray level co-occurrence matrix (GLCM) (n=22)  |                                             |                               |
| Autocorrelation                                | Energy                                      | Inverse Difference Moment     |
| Cluster Prominence                             | Entropy (H)                                 | Normalized (IDMN)             |
| Cluster Shade                                  | Homogeneity 1                               | Inverse Difference Normalized |
| Cluster Tendency                               | Homogeneity 2                               | (IDN)                         |
| Contrast                                       | Informational measure of                    | Inverse variance              |
| Correlation                                    | correlation 1 (IMC1)                        | Maximum Probability           |
| Difference entropy                             | Informational measure of                    | Sum average                   |
| Dissimilarity                                  | correlation 2 (IMC2)                        | Sum entropy                   |
| Sum variance                                   | Variance                                    |                               |
| Gray level run-length matrix (GLRLM) (n=11)    |                                             |                               |
| Short Run Emphasis (SRE)                       | Short Run Low Gray Level Emphasis (SRLGLE)  |                               |
| Long Run Emphasis (LRE)                        | Short Run High Gray Level Emphasis (SRHGLE) |                               |
| Gray Level Non-Uniformity (GLN)                | Long Run Low Gray Level Emphasis (LRLGLE)   |                               |
| Run Length Non-Uniformity (RLN)                | Long Run High Gray Level Emphasis (LRHGLE)  |                               |
| Run Percentage (RP)                            | Low Gray Level Run Emphasis (LGLRE)         |                               |
|                                                | High Gray Level Run Emphasis (HGLRE)        |                               |
